# Supplementary material for: Hydrogel microstructure live-cell array for multiplexed analyses of cancer stem cells, tumor heterogeneity and differential drug response at single-element resolution
Source: Royal Society of Chemistry journal article supplement (doi:10.1039/c6lc00014b), 2016-01-01

**Hydrogel microstructure live-cell array for multiplexed analyses  
of cancer stem cells, tumor heterogeneity and differential drug response  
at single-element resolution**

**E. Afrimzon<sup>‡a</sup>, G. Botchkina<sup>‡b,c</sup>, N. Zurgil<sup>a</sup>, Y. Shafran<sup>a</sup>, M. Sobolev<sup>a</sup>, S. Moshkov<sup>a</sup>,  
O. Ravid-Hermesh<sup>a</sup>, I. Ojima<sup>c</sup>, M. Deutsch<sup>\*a</sup>**

<sup>a</sup>The Biophysical Interdisciplinary Schottenstein Center for the Research and Technology  
of the Cellome, Physics Department, Bldg 214, Bar Ilan University, 5290002, Ramat Gan,  
Israel.

<sup>b</sup>Department of Pathology, Stony Brook University, NY, 11794, USA.

<sup>c</sup>Institute of Chemical Biology & Drug Discovery, Department of Chemistry, Stony Brook  
University, NY, 11794, USA

<sup>‡</sup>Equal contribution

<sup>\*</sup>Corresponding author:

Mordechai Deutsch, Ph.D.

Telephone: 972-3-534-4675

Fax: 972-3-534-1175

E-mail: [motti.jsc@gmail.com](mailto:motti.jsc@gmail.com)

## Electronic Supplementary Information

**Figure S1.**

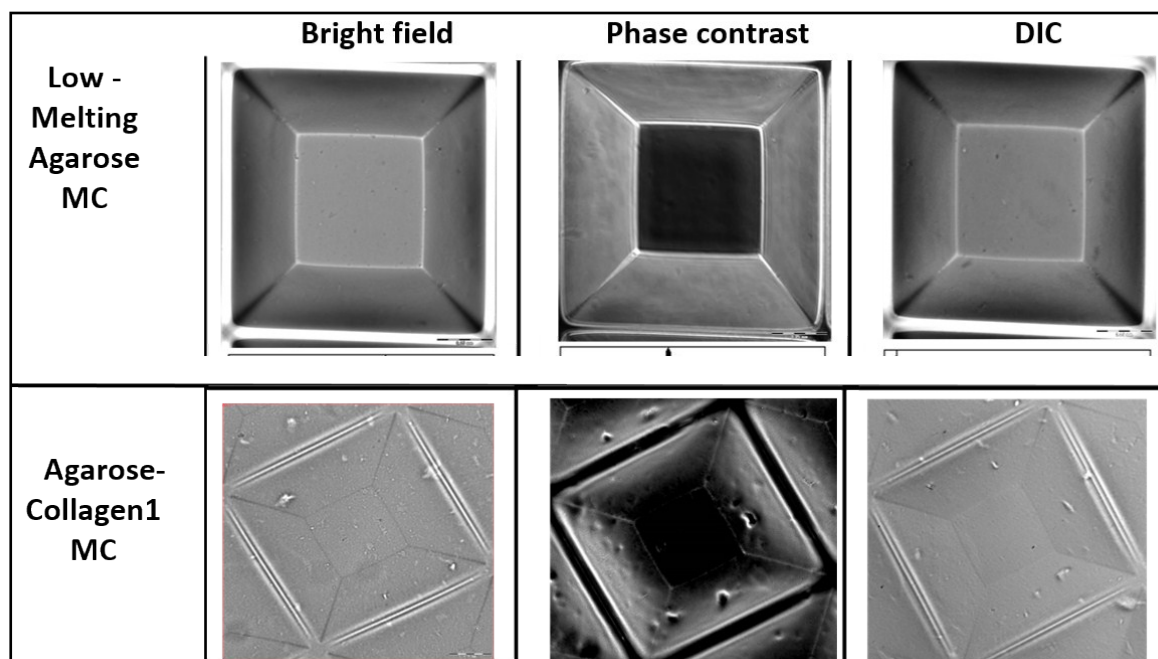

Optical characteristics of HMA. Bright field, phase contrast and DIC images of a representative single MC made of LMA alone (upper panel) and from a collagen I-agarose mixture (lower panel).

**Table 1.**

Evaluations of pixel gray values throughout two adjacent MCs made of PDMC, LMA and a mixture of Collagen I-LMA. Images were acquired by bright field (BF), phase contrast (PC) and differential interference contrast (DIC).

|                | <b>BF</b>   |            |                       |
|----------------|-------------|------------|-----------------------|
|                | <b>PDMS</b> | <b>LMA</b> | <b>Collagen I-LMA</b> |
| <b>Average</b> | 2629.9      | 1646.9     | 467.1                 |
| <b>STD</b>     | 384.4       | 78.1       | 25.7                  |
| <b>CV (%)</b>  | 14.6        | 4.7        | 5.5                   |
| <b>max/min</b> | 4.9         | 2.5        | 2.4                   |
|                |             |            |                       |
|                | <b>PC</b>   |            |                       |
|                | <b>PDMS</b> | <b>LMA</b> | <b>Collagen I-LMA</b> |
| <b>Average</b> | 1672.5      | 2047.3     | 404.7                 |
| <b>STD</b>     | 193.4       | 99.9       | 90.1                  |
| <b>CV (%)</b>  | 11.6        | 4.8        | 22.2                  |
| <b>max/min</b> | 3.6         | 1.7        | 6.6                   |
|                |             |            |                       |
|                | <b>DIC</b>  |            |                       |
|                | <b>PDMS</b> | <b>LMA</b> | <b>Collagen I-LMA</b> |
| <b>Average</b> | 2054.3      | 1981       | 520.8                 |
| <b>STD</b>     | 270         | 53.9       | 27.8                  |
| <b>CV (%)</b>  | 13.1        | 2.7        | 5.3                   |
| <b>max/min</b> | 3.5         | 1.2        | 2.4                   |

**Figure S2.**

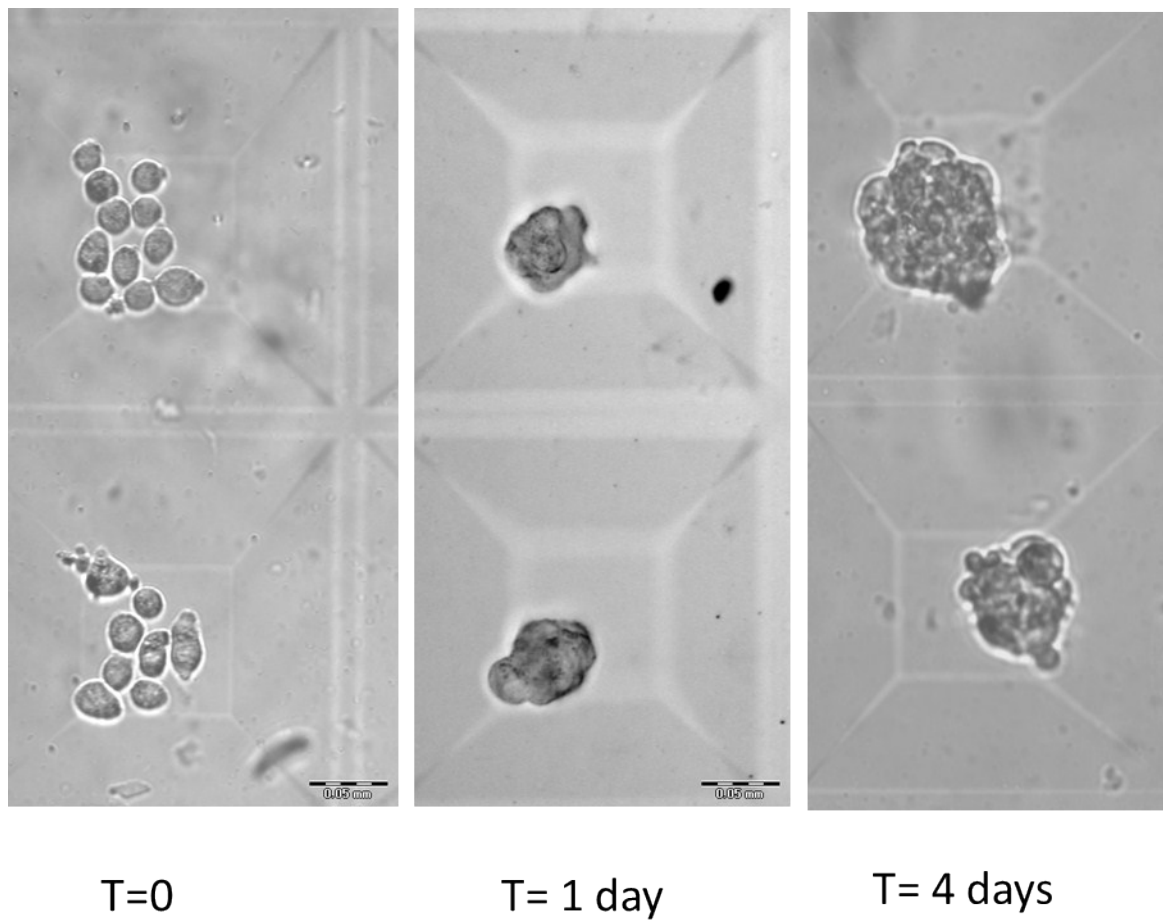

Seeding of A172 glioblastoma cancer cells and generation of glioblastoma spheroids within the HMA

**Figure S3.**

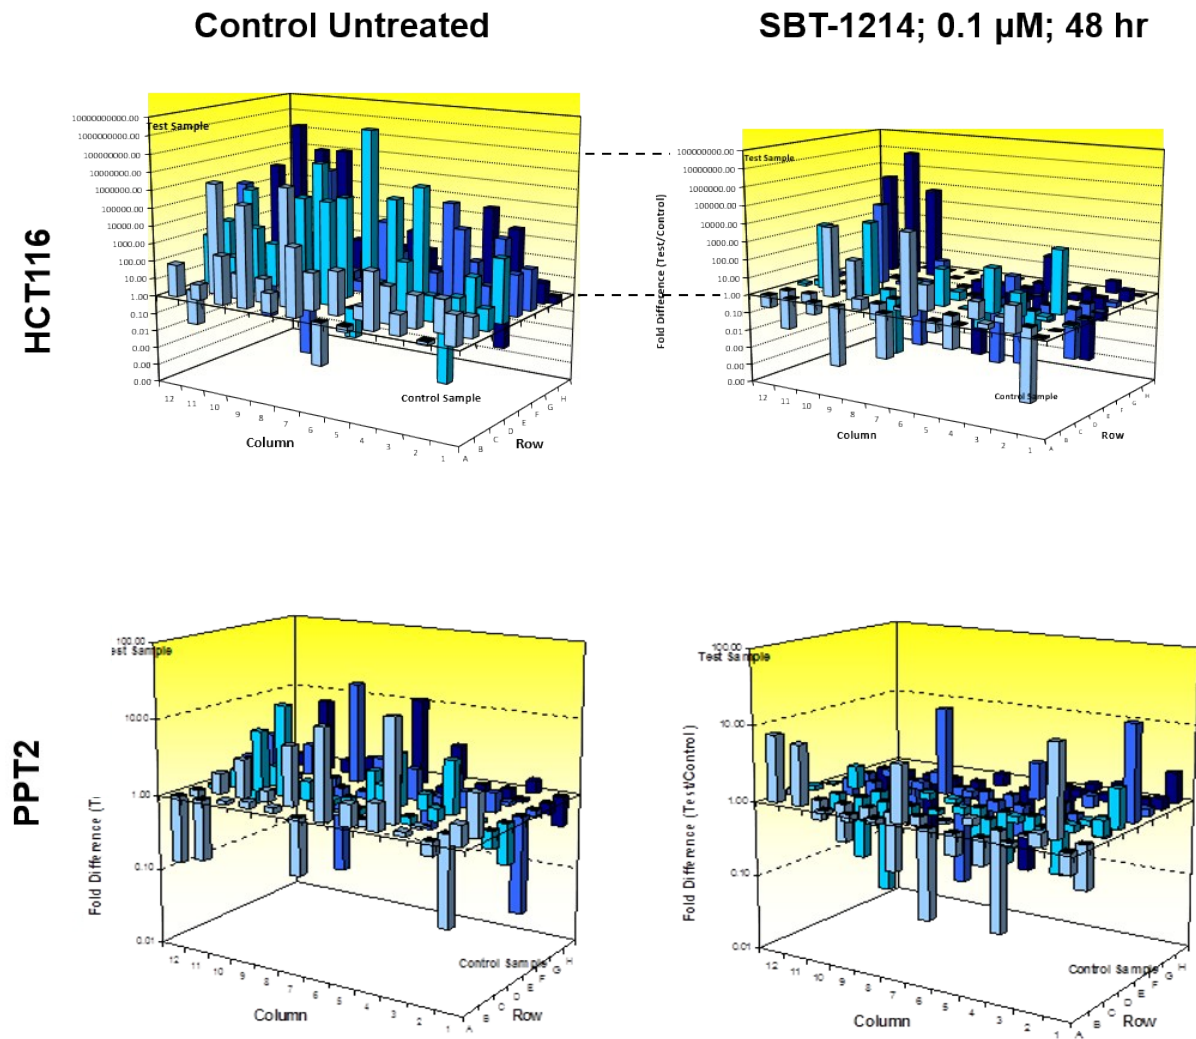

Left panel: Up-regulation of SC genes. (A; SABiosciences; PAHS-405) in colon HCT116 and prostate PPT2 CD133<sup>+</sup>/CD44<sup>+</sup> cell populations (upper quadrants) compared to their differentiated counterparts (lower quadrants). Right panel: Alterations in the stemness-related gene expression profile induced by SBT-1214. Treatment with SBT-1214 (0.1 μM for 48 h) induced dramatic down-regulation of stemness in the majority of SC-related genes in all three types of cells. Thus, significant drug-induced down-regulation of gene expression in HCT116 cells was detected for *SOX1*, *BMP1*, *BMP3*, *NEUROG2*, *S100B*, *FGF1*, *FGFR1*, *RB1*, *ALDH1A1*, *FZD1*, *NUMB*, *ABCG2* and others, many of which are related to SC self-renewal, regulation of symmetric/asymmetric division, pluripotency and drug resistance.

### **Video Clip 1:**

Video clip displaying movement of individual spheroids within the HMA in the course of 65 h.

When the cells are seeded atop the non-adherent surface, non-adherent, free-floating spheroids are generated in aqueous environment.

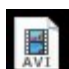

MCF7-65h-Dec2015.avi

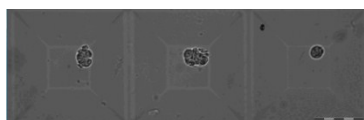

### **Video Clip 2:**

Video clip showing a single PPT2 cell within the HMA in the course of cell division.

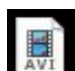

004 BF-PPT2 single cell-twice division.avi

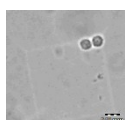

Supplement: c6lc00014b2.pdf [file c6lc00014b2.pdf]
